# Plasma Chemokine Levels Are Associated with the Presence and Extent of Angiographic Coronary Collaterals in Chronic Ischemic Heart Disease

Ellen C. Keeley<sup>1,2\*</sup>, J. Randall Moorman<sup>1,2</sup>, Ling Liu<sup>1,2</sup>, Lawrence W. Gimple<sup>1,2</sup>, Lewis C. Lipson<sup>1,2</sup>, Michael Ragosta<sup>1,2</sup>, Angela M. Taylor<sup>1,2</sup>, Douglas E. Lake<sup>1,2,4</sup>, Marie D. Burdick<sup>2,3</sup>, Borna Mehrad<sup>2,3</sup>, Robert M. Strieter<sup>2,3</sup>

**1** Division of Cardiology, University of Virginia, Charlottesville, Virginia, United States of America, **2** Department of Medicine, University of Virginia, Charlottesville, Virginia, United States of America, **3** Division of Pulmonary and Critical Care Medicine, University of Virginia, Charlottesville, Virginia, United States of America, **4** Department of Statistics, University of Virginia, Charlottesville, Virginia, United States of America

## Abstract

**Background:** In patients with chronic ischemic heart disease (IHD), the presence and extent of spontaneously visible coronary collaterals are powerful determinants of clinical outcome. There is marked heterogeneity in the recruitment of coronary collaterals amongst patients with similar degrees of coronary artery stenoses, but the biological basis of this heterogeneity is not known. Chemokines are potent mediators of vascular remodeling in diverse biological settings. Their role in coronary collateralization has not been investigated. We sought to determine whether plasma levels of angiogenic and angiostatic chemokines are associated with the presence and extent of coronary collaterals in patients with chronic IHD.

**Methodology/Principal Findings:** We measured plasma concentrations of angiogenic and angiostatic chemokine ligands in 156 consecutive subjects undergoing coronary angiography with at least one  $\geq 90\%$  coronary stenosis and determined the presence and extent of spontaneously visible coronary collaterals using the Rentrop scoring system. Eighty-eight subjects (56%) had evidence of coronary collaterals. In a multivariable regression model, the concentration of the angiogenic ligands CXCL5, CXCL8 and CXCL12, hyperlipidemia, and an occluded artery were associated with the presence of collaterals; conversely, the concentration of the angiostatic ligand CXCL11, interferon- $\gamma$ , hypertension and diabetes were associated with the absence of collaterals (ROC area 0.91). When analyzed according to extent of collateralization, higher Rentrop scores were significantly associated with increased concentration of the angiogenic ligand CXCL1 ( $p < 0.0001$ ), and decreased concentrations of angiostatic ligands CXCL9 ( $p < 0.0001$ ), CXCL10 ( $p = 0.002$ ), and CXCL11 ( $p = 0.0002$ ), and interferon- $\gamma$  ( $p = 0.0004$ ).

**Conclusions/Significance:** Plasma chemokine concentrations are associated with the presence and extent of spontaneously visible coronary artery collaterals and may be mechanistically involved in their recruitment.

**Citation:** Keeley EC, Moorman JR, Liu L, Gimple LW, Lipson LC, et al. (2011) Plasma Chemokine Levels Are Associated with the Presence and Extent of Angiographic Coronary Collaterals in Chronic Ischemic Heart Disease. PLoS ONE 6(6): e21174. doi:10.1371/journal.pone.0021174

**Editor:** Pieter H. Reitsma, Leiden University Medical Center, The Netherlands

**Received:** February 7, 2011; **Accepted:** May 21, 2011; **Published:** June 22, 2011

**Copyright:** © 2011 Keeley et al. This is an open-access article distributed under the terms of the Creative Commons Attribution License, which permits unrestricted use, distribution, and reproduction in any medium, provided the original author and source are credited.

**Funding:** This work was supported by the National Institutes of Health (HL97074 to ECK, HL73848 to BM, and CA87879, HL66027 and HL98526 to RMS). The funders had no role in study design, data collection and analysis, decision to publish, or preparation of the manuscript.

**Competing Interests:** The authors have declared that no competing interests exist.

\* E-mail: Keeley@Virginia.edu

## Introduction

Chronic ischemic heart disease (IHD), the most common clinical manifestation of coronary artery disease, results in progressive myocardial ischemia due to gradual narrowing of the coronary arterial lumina and is manifested clinically as medically refractory angina, ischemic cardiomyopathy, congestive heart failure, and cardiac arrhythmias [1]. A major compensatory mechanism in patients with chronic IHD is the recruitment of coronary collaterals, a form of vascular remodeling that can be quantified angiographically. Presence of spontaneously visible coronary collaterals is associated with better outcomes in a broad spectrum of patients with varying degrees of IHD burden [2],

including patients with acute myocardial infarction [3,4,5,6,7,8], and patients with chronic IHD undergoing percutaneous [9,10] and surgical [11,12,13] coronary revascularization. Recruitable coronary collaterals have also been assessed in patients with chronic IHD and are similarly associated with improved clinical outcomes [14]. The assessment of recruitable collaterals in the absence of chronic coronary occlusion, however, requires balloon occlusion of the collateral-receiving artery with simultaneous angiography of the collateral-supplying artery [15]. Thus, the physiological relevance of recruitable collaterals is limited to the context of complete coronary obstructions, whereas the presence of spontaneous collaterals can be seen in situations where lesions are flow-limiting but not necessarily completely occlusive.

Patients with chronic IHD and similar degrees of coronary artery stenosis exhibit marked variability in the presence of spontaneously visible collaterals, but the biological basis of this heterogeneity is not known [16]. Studies of the mechanisms underlying the recruitment of coronary collaterals have, in large part, concentrated on the potential contribution of growth factors including vascular endothelial growth factor (VEGF) and basic fibroblast growth factor (bFGF) with inconsistent results [17,18,19,20,21]. Thus, the mechanisms that contribute to the successful recruitment of coronary collaterals remain obscure.

Chemokines are a superfamily of structurally homologous cytokines that were originally described for their role in mediating leukocyte recruitment, but were subsequently found to be important regulators of vascular remodeling in diverse biological settings [22]. Chemokines are structurally defined by four conserved cysteine residues at their amino terminus and are classified into CC, CXC, C, and CX<sub>3</sub>C families based on the sequence of aminoacids in relation to the first 2 cysteine residues. The CXC ligands are further subdivided on the basis of presence or absence of a glutamic acid-leucine-arginine sequence (Glu-Leu-Arg or 'ELR' motif) immediately adjacent to the CXC motif [23]. The presence of this ELR motif is functionally important, since the ELR-containing CXC chemokine ligands (CXCL1, CXCL2, CXCL3, CXCL5, CXCL6, and CXCL8) are potent promoters of vascular remodeling, whereas a subset of the non-ELR CXC chemokine ligands (CXCL4, CXCL9, CXCL10, CXCL11) are potent inhibitors of angiogenesis [22,23]. The contribution of the CXC chemokines to vascular remodeling of the myocardium in chronic IHD has not been studied in detail. The aim of this study was to test the hypothesis that in patients with chronic IHD, a profile of circulating levels of CXC chemokines is associated with the presence and extent of spontaneously visible coronary collaterals. We found that chemokines play an important role in both the presence and extent of coronary collaterals.

## Methods

### Objectives

To test the hypothesis that in patients with chronic IHD, a profile of circulating levels of CXC chemokines is associated with the presence and extent of spontaneously visible coronary collaterals.

### Participants

We prospectively collected demographic and angiographic data from consecutive patients referred for coronary angiography at the University of Virginia from October 2007 to August 2008. All patients undergoing coronary angiography who were >21 years old and able to provide informed consent were eligible for enrollment. Exclusion criteria were: (1) patients with acute coronary syndromes as defined by unstable or recent progression or acceleration of symptoms and/or elevated blood troponin level; (2) hematocrit <30; (3) active inflammatory, infectious, or malignant disease; (4) expected survival less than one year; and (5) immunosuppressive therapy.

### Description of Procedures

Following vascular access via the femoral, brachial or radial artery and prior to coronary angiography or heparin administration, a 30ml peripheral blood sample was drawn from the side-arm of the sheath, anticoagulated with sodium EDTA, immediately placed on ice, and processed within 30 minutes of retrieval. Platelet-free plasma was aliquoted and frozen at -80°C for subsequent measurement of: CXCL1, CXCL3, CXCL5, CXCL8,

CXCL9, CXCL10, CXCL11, CXCL12, CCL2, VEGF and bFGF, and interferon-gamma (IFN- $\gamma$ ) by multiplex immunoassay using the manufacturer's instruction (Luminex, Bio-Rad, Bio-plex 200 system, Hercules, California; Procarta Cytokine Assay kit, Panomics, Inc., Fremont, California).

Selective coronary angiography was performed in multiple orthogonal views using standard techniques. Each angiogram was initially read by the interventional cardiologist performing the procedure (L.W.G., E.C.K., L.C.L., M.R., or A.M.T.), and the presence, severity, and extent of coronary artery disease was determined and entered into the cardiac catheterization laboratory computerized database. Angiograms reported to have at least one major epicardial artery with a severe stenosis (defined as  $\geq 90\%$  on visual estimation) were re-analyzed separately by 2 independent investigators (E.C.K. and L.L.) blinded to the clinical data and cytokine levels for the presence and extent of coronary collaterals. Since it has been previously shown that a severe flow-limiting coronary artery lesion (defined as a diameter stenosis of  $\geq 90\%$ ) is a prerequisite for spontaneous collateral recruitment [24], only patients in whom the angiogram documented at least one lesion  $\geq 90\%$  were included. The presence and extent of collaterals (if present) was determined according to the Rentrop score [25]. If there was no evidence of a coronary collateral on the angiogram, it was documented as Rentrop = 0; if a collateral was present, it was further graded according to the Rentrop score as follows: Rentrop 1 = filling of side branches of the artery without visualization of epicardial segments; Rentrop 2 = partial filling of an epicardial artery; and Rentrop 3 = complete filling of an epicardial artery. Disparities in Rentrop scores in angiograms from 4 patients were referred by a third blinded investigator (L.C.L.) and data reflecting agreement from 2 of the 3 readers was used for analyses. If the patient had more than one collateral, the collateral with the highest Rentrop score was recorded and used for statistical analyses. The reproducibility of the Rentrop score has been previously described [26].

### Ethics

This study was approved by the institutional review board of the University of Virginia and all patients provided written informed consent.

### Statistical methods

The Fisher's Exact test was used to compare categorical values between patients with and without collaterals and the Wilcoxon rank-sum test was used for continuous variables. Difference of variables by Rentrop score were quantified using non-parametric ANOVA analysis (Kruskal-Wallis test). All continuous variables are reported as medians with interquartile ranges (IQR). A logistic regression model using a stepwise backward-selection technique was used to generate a multivariable model to determine the factors associated with the presence or absence of collaterals. The likelihood ratio test was used to test the significance of the variables. Candidate variables included age, extent of coronary artery disease, hypertension, diabetes, tobacco use, family history of coronary artery disease, hyperlipidemia, history of angina, history of peripheral vascular disease, history of congestive heart failure, history of arrhythmias, history of stroke, prior myocardial infarction, prior coronary artery bypass surgery, prior percutaneous coronary intervention, presence of an occluded artery and HMG Co-A reductase inhibitor therapy. A stepwise backward selection was performed using a threshold of  $p < 0.10$ . All analyses were performed with SAS 9.1 (SAS Institute, Cary, NC) or MATLAB 7.9 (Natick, MA). A two-sided  $p$  value of  $< 0.05$  was considered statistically significant.

## Results

We enrolled 275 consecutive patients of whom 156 (57%) had a stenosis of  $\geq 90\%$  in at least one major epicardial coronary artery. Clinical characteristics of the 156 patients are shown in Table 1. Of the 156 patients, 88 (56%) had angiographic evidence of collateralization. There were no significant differences in baseline demographics (including race, data not shown), cardiac risk factors, medical co-morbidities, and chronic medications between patients with and without collaterals. Patients with collaterals had a higher mean number of diseased vessels ( $2.4 \pm 1.2$  vs  $1.9 \pm 1.0$ ,  $p = 0.009$ ), and were more likely to have at least one occluded coronary artery (85% vs 28%,  $p < 0.0001$ ), while patients without collaterals were more likely to have disease of a single coronary artery (43% vs 25%,  $p = 0.025$ ) (Table 1).

## Determinants of the presence of collaterals

In order to determine whether specific angiogenic and angiostatic factors and clinical characteristics were associated with either the *presence* or *absence* of collaterals we first performed a univariate analysis (Table 2). Subsequently, we performed a multivariate analysis (Table 3) that included all the cytokines and clinical characteristics listed in Table 2. In this best-fit model (ROC area 0.91; sensitivity 80%, specificity 88% at an optimal cutpoint), the factors associated with the presence of collaterals were the chemokine profile consisting of CXCL5 ( $p = 0.018$ ), CXCL8 ( $p = 0.031$ ), and CXCL12 ( $p = 0.033$ ), and the clinical factors of hyperlipidemia ( $p = 0.047$ ), and the presence of an occluded artery ( $p < 0.0001$ ). Factors associated with the absence of collaterals were the cytokine profile consisting of CXCL11 ( $p = 0.002$ ) and IFN- $\gamma$  ( $p = 0.021$ ), and the clinical factors of

**Table 1.** Clinical characteristics of patients with  $\geq 90\%$  stenosis of at least one coronary artery.

|                                           | with collaterals (n = 88) |  | no collaterals (n = 68) |  | p value |
|-------------------------------------------|---------------------------|--|-------------------------|--|---------|
| <b>Demographic data</b>                   |                           |  |                         |  |         |
| Men                                       | 66 (75%)                  |  | 50 (74%)                |  | 0.855   |
| Age (yrs, mean +/- SD)                    | 62±11                     |  | 62±12                   |  | 0.916   |
| <b>Cardiac risk factors</b>               |                           |  |                         |  |         |
| Diabetes                                  | 29 (33%)                  |  | 31 (46%)                |  | 0.135   |
| Hypertension                              | 71 (81%)                  |  | 62 (91%)                |  | 0.073   |
| Hyperlipidemia                            | 81 (92%)                  |  | 58 (85%)                |  | 0.203   |
| Current tobacco use                       | 30 (34%)                  |  | 25 (37%)                |  | 0.739   |
| Peripheral vascular disease               | 27 (31%)                  |  | 19 (28%)                |  | 0.727   |
| Family history of coronary artery disease | 43 (49%)                  |  | 30 (44%)                |  | 0.628   |
| <b>Medical history</b>                    |                           |  |                         |  |         |
| Prior stroke                              | 8 (9%)                    |  | 10 (15%)                |  | 0.318   |
| Prior angina pectoris                     | 50 (57%)                  |  | 41 (60%)                |  | 0.744   |
| Congestive heart failure                  | 9 (10%)                   |  | 6 (9%)                  |  | 1.000   |
| Prior myocardial infarction               | 40 (45%)                  |  | 24 (35%)                |  | 0.251   |
| History of cardiac arrhythmias            | 8 (9%)                    |  | 7 (10%)                 |  | 0.792   |
| Prior coronary artery bypass surgery      | 23 (26%)                  |  | 15 (22%)                |  | 0.579   |
| Prior percutaneous coronary intervention  | 27 (31%)                  |  | 26 (38%)                |  | 0.310   |
| <b>Chronic medications</b>                |                           |  |                         |  |         |
| Beta-blocker                              | 64 (73%)                  |  | 53 (78%)                |  | 0.576   |
| Angiotensin-converting enzyme inhibitor   | 44 (50%)                  |  | 37 (54%)                |  | 0.746   |
| Aspirin                                   | 79 (90%)                  |  | 63 (93%)                |  | 1.000   |
| Insulin                                   | 12 (14%)                  |  | 17 (25%)                |  | 0.098   |
| Oral hypoglycemic                         | 11 (13%)                  |  | 7 (10%)                 |  | 0.802   |
| Calcium channel-blocker                   | 17 (19%)                  |  | 9 (13%)                 |  | 0.288   |
| Clopidogrel                               | 20 (23%)                  |  | 15 (22%)                |  | 0.849   |
| HMG coA-reductase inhibitor               | 68 (77%)                  |  | 52 (76%)                |  | 0.693   |
| <b>Extent of coronary artery disease</b>  |                           |  |                         |  |         |
| Number of diseased vessels                | 2.4±1.2                   |  | 1.9±1.0                 |  | 0.009   |
| 1-vessel disease                          | 22 (25%)                  |  | 29 (43%)                |  | 0.025   |
| 2-vessel disease                          | 27 (31%)                  |  | 19 (28%)                |  | 0.727   |
| 3-vessel disease                          | 26 (29%)                  |  | 17 (25%)                |  | 0.590   |
| >3 vessel disease                         | 13 (15%)                  |  | 3 (4%)                  |  | 0.060   |
| Presence of any occluded artery           | 75 (85%)                  |  | 19 (28%)                |  | <0.0001 |

doi:10.1371/journal.pone.0021174.t001

**Table 2.** Univariate predictors of the presence of coronary artery collaterals.

| Variable                                  | Estimate (x10 <sup>4</sup> ) | p value |
|-------------------------------------------|------------------------------|---------|
| <b>Angiogenic and angiostatic factors</b> |                              |         |
| Angiogenic                                |                              |         |
| CXCL1                                     | +0.022                       | 0.428   |
| CXCL3                                     | +2.895                       | 0.056   |
| CXCL5                                     | +0.406                       | 0.041   |
| CXCL8                                     | +1.154                       | 0.277   |
| CXCL12                                    | +0.579                       | 0.169   |
| CCL2                                      | +5.445                       | 0.246   |
| VEGF*                                     | -0.385                       | 0.604   |
| bFGF†                                     | +0.346                       | 0.100   |
| Angiostatic                               |                              |         |
| CXCL9                                     | +0.014                       | 0.722   |
| CXCL10                                    | +0.137                       | 0.618   |
| CXCL11                                    | -1.350                       | 0.027   |
| IFN-γ‡                                    | -3.858                       | 0.013   |
| <b>Clinical factors</b>                   |                              |         |
| Hypertension                              | -2.275                       | 0.006   |
| Diabetes                                  | -1.017                       | 0.053   |
| Current tobacco use                       | -0.418                       | 0.431   |
| Family history of coronary artery disease | -0.214                       | 0.666   |
| Hyperlipidemia                            | +2.087                       | 0.032   |
| Prior angina pectoris                     | -0.566                       | 0.259   |
| Peripheral vascular disease               | +0.088                       | 0.891   |
| Congestive heart failure                  | -0.522                       | 0.586   |
| History of cardiac arrhythmias            | -0.200                       | 0.797   |
| Prior myocardial infarction               | +0.727                       | 0.165   |
| Prior stroke                              | -1.203                       | 0.187   |
| Prior percutaneous coronary intervention  | -0.841                       | 0.120   |
| Prior coronary artery bypass surgery      | -1.734                       | 0.006   |
| Presence of an occluded artery            | +4.302                       | <0.0001 |
| Number of diseased vessels                | -0.003                       | 0.990   |

\*VEGF = vascular endothelial growth factor, †bFGF = basic fibroblast growth factor, ‡IFN = interferon.

doi:10.1371/journal.pone.0021174.t002

hypertension ( $p=0.007$ ), and diabetes ( $p=0.004$ ). The remaining cytokines, including VEGF and bFGF, were not associated with the presence or absence of collaterals in the best-fit model.

### Determinants of the extent of collaterals

In order to determine whether chemokine levels are predictive of the extent of collateralization, when present, we measured plasma levels of the individual cytokines in patients with collaterals (Rentrop score of 1 to 3) and without collaterals (Rentrop score of 0) (Table 4,  $p$  values represent differences among groups, one-way ANOVA). Increasing Rentrop scores (representing more extensive collateralization), were associated with increasing median plasma levels of the angiogenic CXC chemokine, CXCL1 ( $p<0.0001$  for differences among groups, one-way ANOVA) (Table 4, Figure 1). Increasing Rentrop scores were also associated with progressively lower levels of the angiostatic CXC chemokines, CXCL9 ( $p<0.0001$ ), CXCL10 ( $p=0.002$ ), and CXCL11 ( $p=0.0002$ ). IFN- $\gamma$  is a potent inducer of the angiostatic chemokines CXCL9,

**Table 3.** Best fit (multivariate) model for the presence of coronary artery collaterals.

| Variable                       | Estimate (x10 <sup>4</sup> ) | p value |
|--------------------------------|------------------------------|---------|
| CXCL5                          | +0.609                       | 0.018   |
| CXCL8                          | +2.555                       | 0.031   |
| CXCL11                         | -2.409                       | 0.002   |
| CXCL12                         | +1.389                       | 0.033   |
| IFN-gamma                      | -3.833                       | 0.021   |
| Hyperlipidemia                 | +1.924                       | 0.047   |
| Hypertension                   | -2.431                       | 0.007   |
| Diabetes                       | -1.729                       | 0.004   |
| Presence of an occluded artery | +4.588                       | <0.0001 |

IFN = interferon.

doi:10.1371/journal.pone.0021174.t003

CXCL10, and CXCL11, and the levels of IFN- $\gamma$  were similarly negatively correlated to the extent of coronary collaterals ( $p=0.0004$ ) (Table 4, Figure 2). In addition, we found that CXCL12 ( $p=0.022$ ), VEGF ( $p=0.008$ ) and CCL2 ( $p=0.0002$ ) had a significant negative correlation across increasing Rentrop scores (Table 4, Figure 2). There was no difference in the levels of bFGF between patients with and without collaterals (Table 4, Figure 2).

### Discussion

In patients with chronic IHD, coronary collateralization maintains myocardial viability in the collateral-fed distribution [27] and is associated with fewer and smaller myocardial infarctions [5], less ventricular aneurysm formation, better left ventricular function, less arrhythmias and better survival compared to those who do not recruit collaterals [2,12,13,14,28,29]. It is recognized that patients with similar extent and severity of coronary artery disease exhibit marked heterogeneity in the presence and extent of angiographically detectable spontaneous coronary collaterals; this heterogeneity is not explained by traditional cardiac risk factors. Our multivariable model, which includes clinical factors and cytokine levels, suggests that the angiogenic and angiostatic CXC chemokines play an important role in both the presence and extent of spontaneously visible coronary collaterals.

Prior studies that examined the role of clinical factors on coronary collateralization have yielded conflicting results: For example, in some studies, diabetes mellitus was found to be a negative predictor of the presence of collaterals [30,31,32,33,34], while in others it was not [35,36,37,38,39]. In the present study, we found a negative association between diabetes mellitus and coronary collateralization and a positive association with hyperlipidemia, but independent of HMG-CoA reductase inhibitor therapy as has been reported by others [40,41]. As expected, we also found that patients who had at least one occluded coronary artery were more likely to have collaterals than those who did not.

Substantial preclinical data have implicated growth factors as critical mediators of collateral formation in animal models of hind limb ischemia (reviewed in [42]). Based on this literature, studies of mediators of vascular remodeling in humans have primarily focused on the role of the growth factors VEGF and bFGF in coronary collateralization in chronic IHD [17,18,19,20,21,34,43,44]. With regard to the role of growth factors as predictors of coronary collaterals, studies have been

**Table 4.** Plasma levels of angiogenic and angiostatic factors according to collateralization.

|                    | Rentrop 0<br>(n = 68) |                  | Rentrop 1<br>(n = 28) |                  | Rentrop 2<br>(n = 34) |                  | Rentrop 3<br>(n = 26) |                  | p value |
|--------------------|-----------------------|------------------|-----------------------|------------------|-----------------------|------------------|-----------------------|------------------|---------|
|                    | Median<br>pg/ml       | IQR <sup>§</sup> | Median<br>pg/ml       | IQR <sup>§</sup> | Median<br>pg/ml       | IQR <sup>§</sup> | Median<br>pg/ml       | IQR <sup>§</sup> |         |
| <b>Angiogenic</b>  |                       |                  |                       |                  |                       |                  |                       |                  |         |
| CXCL1              | 6358                  | 1674–0017        | 2798                  | 1386–7429        | 6702                  | 1276–15147       | 24966                 | 10206–138085     | <0.0001 |
| CXCL3              | 667                   | 235–1503         | 1045                  | 679–1950         | 960                   | 345–1394         | 876                   | 381–1384         | 0.278   |
| CXCL5              | 6542                  | 4538–9431        | 7821                  | 4251–13609       | 8517                  | 5058–14425       | 9247                  | 5081–21997       | 0.272   |
| CXCL8              | 1120                  | 468–2722         | 2095                  | 759–3642         | 1190                  | 679–2212         | 1024                  | 420–2845         | 0.398   |
| CXCL12             | 2234                  | 1888–10176       | 9989                  | 2234–11274       | 2353                  | 2043–9640        | 2107                  | 1991–3099        | 0.022   |
| CCL2               | 80                    | 40–168           | 152                   | 83–486           | 90                    | 22–156           | 39                    | 27–95            | 0.0002  |
| VEGF*              | 1565                  | 660–2579         | 1947                  | 1266–3710        | 1428                  | 262–2450         | 761                   | 0–1700           | 0.008   |
| bFGF†              | 0                     | 0–1170           | 0                     | 0–10990          | 0                     | 0–4177           | 52                    | 0–4820           | 0.555   |
| <b>Angiostatic</b> |                       |                  |                       |                  |                       |                  |                       |                  |         |
| CXCL9              | 4905                  | 1005–22397       | 17381                 | 8951–37874       | 5394                  | 848–9150         | 392                   | 0–3019           | <0.0001 |
| CXCL10             | 1375                  | 737–2251         | 1664                  | 1324–3692        | 1232                  | 795–1967         | 722                   | 580–2008         | 0.002   |
| CXCL11             | 6085                  | 3568–9169        | 7710                  | 5664–11733       | 5349                  | 3252–8558        | 3155                  | 2455–6011        | 0.0002  |
| IFN- $\gamma$ ‡    | 311                   | 147–565          | 552                   | 371–1204         | 290                   | 154–512          | 189                   | 92–431           | 0.0004  |

\*VEGF = vascular endothelial growth factor, †bFGF = basic fibroblast growth factor, ‡IFN = interferon, §IQR = inter-quartile range.  
doi:10.1371/journal.pone.0021174.t004

inconsistent, with some [18,21] but not others [17,19,20] reporting a positive association between plasma growth factors and the presence of collaterals. For instance, in a study with a similar design to ours, plasma levels of VEGF, PDGF, bFGF, or

hepatocyte growth factor did not differ significantly between patients with and without coronary collaterals [20]. Surprisingly, we found that VEGF and bFGF levels were not associated with the presence of collaterals; moreover, we found

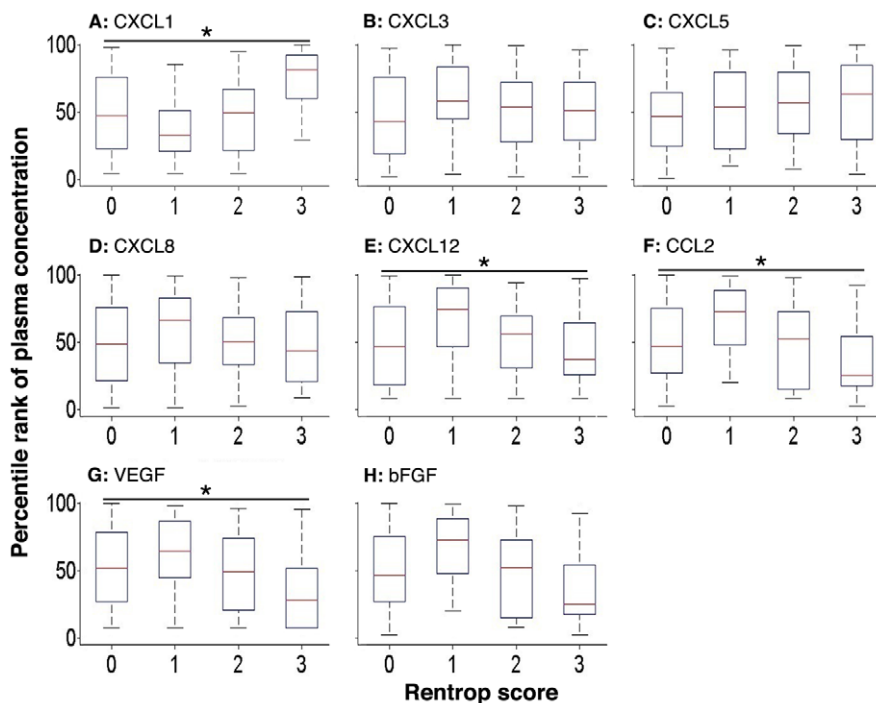

**Figure 1.** Box plots (median and interquartile range) of percentile rank of plasma concentrations of cytokines that promote vascular remodeling: CXCL1 (panel A), CXCL3 (panel B), CXCL5 (panel C), CXCL8 (panel D), CXCL12 (panel E), CCL2 (panel F), VEGF (panel G), and bFGF (panel H). CXCL1 (\* $p < 0.0001$ ), CXCL12 (\* $p = 0.0022$ ), CCL2 (\* $p = 0.0002$ ), and VEGF (\* $p = 0.008$ ) significantly correlated across increasing Rentrop scores.  
doi:10.1371/journal.pone.0021174.g001

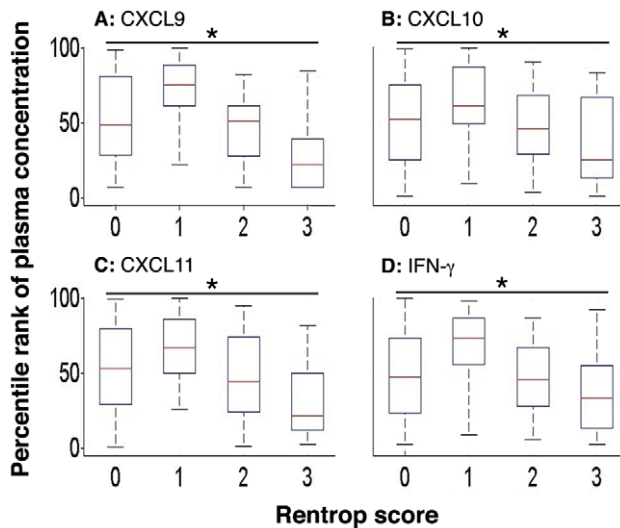

**Figure 2. Box plots (median and interquartile range) of percentile rank of plasma concentrations of cytokines that inhibit vascular remodeling: CXCL9 (panel A), CXCL10 (panel B), CXCL11 (panel C), and IFN- $\gamma$  (panel D).** All cytokines significantly correlated across increasing Rentrop scores: CXCL9 ( $*p < 0.0001$ ), CXCL10 ( $*p = 0.002$ ), CXCL11 ( $*p = 0.0002$ ), and IFN- $\gamma$  ( $*p = 0.0004$ ). doi:10.1371/journal.pone.0021174.g002

a *negative* association between plasma VEGF concentration and the extent of collateralization when present.

The role of chemokines in mediating vascular remodeling has been extensively documented in diverse biological settings, with the notable exception of revascularization of ischemic myocardium. In one study using a canine model of ischemia/reperfusion injury, investigators showed that short periods of ischemia/reperfusion that were not sufficient to produce a myocardial infarction resulted in increased expression of CCL2 mRNA in the ischemic myocardium suggesting a potential role in angiogenesis [45]. Investigators have reported the over-expression of CXCL8 in atherectomy samples from human coronary artery plaque [46]. Others have shown myocardial chemokine and chemokine receptor expression in human end-stage heart failure [47], but their specific contribution to vascular remodeling has not been established. While these studies primarily concentrated on specific chemokines such as CCL2 and CXCL8, we present data on a complete panel of angiogenic and angiostatic chemokines. Lastly, in a previous clinical study, a predictive model incorporating plasma chemokine levels identified individuals with clinically significant coronary artery disease with better resolution than traditional cardiac risk factors [48]. However, this study did not address the issue of collaterals and the model did not include angiogenic CXC chemokine ligands.

Interestingly, angiogenic and angiostatic factors associated with the *presence* or *absence* of collaterals were not found to be necessarily associated with the *extent* of collateralization in our dataset: for example, CXCL5, CXCL8, CXCL11, CXCL12, and IFN- $\gamma$  added significant independent information about the presence or absence of collaterals (Table 3), while CXCL1, CCL2, CXCL9, and CXCL10 added information regarding the extent of collateralization (Table 4, Figures 1 and 2). We interpret this finding as follows: local myocardial ischemia may serve as a stimulus for angiogenic chemokine secretion and collateral recruitment. As the collateral is successfully recruited, the ischemic stimulus is no longer operational, resulting in downregulation of the angiogenic ligand. Our model suggests

that while arterial occlusion, but not extent of coronary artery disease, is an important first step in recruiting collaterals, their subsequent development is affected by circulating chemokine levels.

### Limitations

Our study has several limitations. First, we may have underestimated the presence of collaterals by measuring only spontaneously visible coronary collaterals [14,15,18,28,29]. Second, due to the relatively small number of patients, our study may be under-powered to detect significant differences in baseline demographics between the two groups. Third, it is possible that there were differences in factors we did not collect, including the chronicity of angina and participation in a regular exercise program. Fourth, the measurement of CXC chemokines in plasma may be subject to methodological and biological variability. However, we minimized such variability by collecting the samples before the first administration of heparin, and by rapidly cooling and processing the samples. The plasma samples were frozen at  $-80^{\circ}\text{C}$  in multiple aliquots from each patient, and all measurements were taken on samples that had been thawed only once. Biological variability was also minimized since all our patients were fasting and at steady-state prior to angiography. Although we did not enroll patients with known unstable angina or myocardial infarction, it is possible that recent symptoms in the peri-catheterization period that were not captured on our history could have affected our results. Nonetheless, since the plasma half-lives of chemokine ligands are short ( $\sim 2$  hrs), plasma levels are more likely representative of on-going myocardial ischemia than remote events. Finally and most importantly, our results reflect an association but do not establish a causal relationship between the presence and extent of coronary artery collaterals and levels of circulating chemokines, which is not possible in a human system.

The biological basis for the heterogeneity in coronary collateralization in patients with chronic IHD has not been established and is important to patient outcomes. Our findings indicate that an occluded coronary artery is highly correlated with the presence of a spontaneously visible collateral, and plasma concentrations of angiogenic and angiostatic chemokines (but not growth factors) add significant independent information regarding the presence and extent of collaterals, supporting the hypothesis that these molecules are associated with recruitment of coronary collaterals to the chronically ischemic myocardium.

The present work has two potential implications: first, it provides insight into a plausible biological mechanism that underlies the clinically observed heterogeneity in the degree of spontaneously visible coronary collateralization in patients with chronic IHD. If future studies identify angiogenic and angiostatic chemokines as mediating collateral recruitment in this population, this may translate into potential therapeutic options. Second, the present study shows that a statistical model can identify the presence and extent of spontaneous collaterals in a cross-sectional analysis. If this model is found to identify IHD patients destined to recruit collaterals in future longitudinal studies, it may impact the management of this common illness. Lastly, the mechanism(s) behind the selective increase in angiogenic chemokines accompanied by a reduction in IFN-gamma inducible angiostatic CXC chemokines seen in our study is unknown and warrants further study including the possibility of genetic variation.

### Acknowledgments

Cynthia Scott-Simms, R.N. for help in subject recruitment and collection of samples.



## Author Contributions

Conceived and designed the experiments: ECK BM RMS JRM. Performed the experiments: ECK JRM LL BM LWG LCL MR AMT

## References

- Rosamond W, Flegal K, Furie K, Go A, Greenlund K, et al. (2008) Heart disease and stroke statistics—2008 update: a report from the American Heart Association Statistics Committee and Stroke Statistics Subcommittee. *Circulation* 117: e25–146.
- Regieli JJ, Jukema JW, Nathoe HM, Zwinderman AH, Ng S, et al. (2009) Coronary collaterals improve prognosis in patients with ischemic heart disease. *Int J Cardiol* 132: 257–262.
- Hirai T, Fujita M, Nakajima H, Asanoi H, Yamanishi K, et al. (1989) Importance of collateral circulation for prevention of left ventricular aneurysm formation in acute myocardial infarction. *Circulation* 79: 791–796.
- Kodama K, Kusuoka H, Sakai A, Adachi T, Hasegawa S, et al. (1996) Collateral channels that develop after an acute myocardial infarction prevent subsequent left ventricular dilation. *J Am Coll Cardiol* 27: 1133–1139.
- Habib GB, Heibig J, Forman SA, Brown BG, Roberts R, et al. (1991) Influence of coronary collateral vessels on myocardial infarct size in humans. Results of phase I thrombolysis in myocardial infarction (TIMI) trial. The TIMI Investigators. *Circulation* 83: 739–746.
- Elsman P, van 't Hof AW, de Boer MJ, Hoorntje JC, Suryapranata H, et al. (2004) Role of collateral circulation in the acute phase of ST-segment-elevation myocardial infarction treated with primary coronary intervention. *Eur Heart J* 25: 854–858.
- Ishihara M, Inoue I, Kawagoe T, Shimatani Y, Kurisu S, et al. (2005) Comparison of the cardioprotective effect of prodromal angina pectoris and collateral circulation in patients with a first anterior wall acute myocardial infarction. *Am J Cardiol* 95: 622–625.
- Desch S, de Waha S, Eitel I, Koch A, Gutberlet M, et al. (2010) Effect of coronary collaterals on long-term prognosis in patients undergoing primary angioplasty for acute ST-elevation myocardial infarction. *Am J Cardiol* 106: 605–611.
- Koerselman J, de Jaegere PP, Verhaar MC, Grobbee DE, van der Graaf Y (2005) Prognostic significance of coronary collaterals in patients with coronary heart disease having percutaneous transluminal coronary angioplasty. *Am J Cardiol* 96: 390–394.
- Abbott JD, Choi EJ, Selzer F, Srinivas VS, Williams DO (2005) Impact of coronary collaterals on outcome following percutaneous coronary intervention (from the National Heart, Lung, and Blood Institute Dynamic Registry). *Am J Cardiol* 96: 676–680.
- Nathoe HM, Buskens E, Jansen EW, Suyker WJ, Stella PR, et al. (2004) Role of coronary collaterals in off-pump and on-pump coronary bypass surgery. *Circulation* 110: 1738–1742.
- Nathoe HM, Koerselman J, Buskens E, van Dijk D, Stella PR, et al. (2006) Determinants and prognostic significance of collaterals in patients undergoing coronary revascularization. *Am J Cardiol* 98: 31–35.
- Caputo M, Anis RR, Rogers CA, Ahmad N, Rizvi SI, et al. (2008) Coronary collateral circulation: effect on early and midterm outcomes after off-pump coronary artery bypass surgery. *Ann Thorac Surg* 85: 71–79.
- Billinger M, Kloos P, Eberli FR, Windecker S, Meier B, et al. (2002) Physiologically assessed coronary collateral flow and adverse cardiac ischemic events: a follow-up study in 403 patients with coronary artery disease. *J Am Coll Cardiol* 40: 1545–1550.
- Seiler C (2010) The human coronary collateral circulation. *Eur J Clin Invest* 40: 465–476.
- Koerselman J, van der Graaf Y, de Jaegere PP, Grobbee DE (2003) Coronary collaterals: an important and underexposed aspect of coronary artery disease. *Circulation* 107: 2507–2511.
- Briguori C, Testa U, Colombo A, Petrucci E, Condorelli G, et al. (2006) Relation of various plasma growth factor levels in patients with stable angina pectoris and total occlusion of a coronary artery to the degree of coronary collaterals. *Am J Cardiol* 97: 472–476.
- Fleisch M, Billinger M, Eberli FR, Garachemani AR, Meier B, et al. (1999) Physiologically assessed coronary collateral flow and intracoronary growth factor concentrations in patients with 1- to 3-vessel coronary artery disease. *Circulation* 100: 1945–1950.
- Panchal VR, Rehman J, Nguyen AT, Brown JW, Turrentine MW, et al. (2004) Reduced pericardial levels of endostatin correlate with collateral development in patients with ischemic heart disease. *J Am Coll Cardiol* 43: 1383–1387.
- Sherman JA, Hall A, Malenka DJ, De Muinck ED, Simons M (2006) Humoral and cellular factors responsible for coronary collateral formation. *Am J Cardiol* 98: 1194–1197.
- Werner GS, Jandt E, Krack A, Schwarz G, Mutschke O, et al. (2004) Growth factors in the collateral circulation of chronic total coronary occlusions: relation to duration of occlusion and collateral function. *Circulation* 110: 1940–1945.
- Keeley EC, Mehrad B, Strieter RM (2008) Chemokines as mediators of neovascularization. *Arterioscler Thromb Vasc Biol* 28: 1928–1936.
- Strieter RM, Polverini PJ, Kunkel SL, Arenberg DA, Burdick MD, et al. (1995) The functional role of the ELR motif in CXC chemokine-mediated angiogenesis. *J Biol Chem* 270: 27348–27357.
- Levin DC (1974) Pathways and functional significance of the coronary collateral circulation. *Circulation* 50: 831–837.
- Rentrop KP, Cohen M, Blanke H, Phillips RA (1985) Changes in collateral channel filling immediately after controlled coronary artery occlusion by an angioplasty balloon in human subjects. *J Am Coll Cardiol* 5: 587–592.
- van Liebergen RA, Piek JJ, Koch KT, de Winter RJ, Schotborgh CE, et al. (1999) Quantification of collateral flow in humans: a comparison of angiographic, electrocardiographic and hemodynamic variables. *J Am Coll Cardiol* 33: 670–677.
- Piek JJ, van Liebergen RA, Koch KT, Peters RJ, David GK (1997) Clinical, angiographic and hemodynamic predictors of recruitable collateral flow assessed during balloon angioplasty coronary occlusion. *J Am Coll Cardiol* 29: 275–282.
- Berry C, Balachandran KP, L'Allier PL, Lesperance J, Bonan R, et al. (2007) Importance of collateral circulation in coronary heart disease. *Eur Heart J* 28: 278–291.
- Meier P, Gloekler S, Zbinden R, Beckh S, de Marchi SF, et al. (2007) Beneficial effect of recruitable collaterals: a 10-year follow-up study in patients with stable coronary artery disease undergoing quantitative collateral measurements. *Circulation* 116: 975–983.
- Abaci A, Oguzhan A, Kahraman S, Eryol NK, Unal S, et al. (1999) Effect of diabetes mellitus on formation of coronary collateral vessels. *Circulation* 99: 2239–2242.
- Kornowski R (2003) Collateral formation and clinical variables in obstructive coronary artery disease: the influence of hypercholesterolemia and diabetes mellitus. *Coron Artery Dis* 14: 61–64.
- Nisanci Y, Sezer M, Umman B, Yilmaz E, Mercanoglu S, et al. (2002) Relationship between pressure-derived collateral blood flow and diabetes mellitus in patients with stable angina pectoris: a study based on coronary pressure measurement. *J Invasive Cardiol* 14: 118–122.
- Nurkalem Z, Gorgulu S, Uslu N, Alper AT, Orhan AL, et al. (2008) Effect of glucometabolic disorders on the formation of coronary collaterals in occlusive coronary artery disease. *Acta Cardiol* 63: 141–146.
- Waltenberger J (2001) Impaired collateral vessel development in diabetes: potential cellular mechanisms and therapeutic implications. *Cardiovasc Res* 49: 554–560.
- Cohen M, Sherman W, Rentrop KP, Gorlin R (1989) Determinants of collateral filling observed during sudden controlled coronary artery occlusion in human subjects. *J Am Coll Cardiol* 13: 297–303.
- Mason MJ, Walker SK, Patel DJ, Paul VE, Ilsley CD (2000) Influence of clinical and angiographic factors on development of collateral channels. *Coron Artery Dis* 11: 573–578.
- Olijhoek JK, Koerselman J, de Jaegere PP, Verhaar MC, Grobbee DE, et al. (2005) Presence of the metabolic syndrome does not impair coronary collateral vessel formation in patients with documented coronary artery disease. *Diabetes Care* 28: 683–689.
- Pohl T, Seiler C, Billinger M, Herren E, Wustmann K, et al. (2001) Frequency distribution of collateral flow and factors influencing collateral channel development. Functional collateral channel measurement in 450 patients with coronary artery disease. *J Am Coll Cardiol* 38: 1872–1878.
- Zbinden R, Zbinden S, Billinger M, Windecker S, Meier B, et al. (2005) Influence of diabetes mellitus on coronary collateral flow: an answer to an old controversy. *Heart* 91: 1289–1293.
- Dincer I, Ongun A, Turhan S, Ozdol C, Kumbasar D, et al. (2006) Association between the dosage and duration of statin treatment with coronary collateral development. *Coron Artery Dis* 17: 561–565.
- Pourati I, Kimmelstiel C, Rand W, Karas RH (2003) Statin use is associated with enhanced collateralization of severely diseased coronary arteries. *Am Heart J* 146: 876–881.
- Hughes GC, Annex BH (2005) Angiogenic therapy for coronary artery and peripheral arterial disease. *Expert Rev Cardiovasc Ther* 3: 521–535.
- Chung NA, Lydakis C, Belgore F, Li-Saw-Hec FL, Blann AD, et al. (2003) Angiogenesis, thrombogenesis, endothelial dysfunction and angiographic severity of coronary artery disease. *Heart* 89: 1411–1415.
- Schultz A, Lavi L, Hochberg I, Beyar R, Stone T, et al. (1999) Interindividual heterogeneity in the hypoxic regulation of VEGF: significance for the development of the coronary artery collateral circulation. *Circulation* 100: 547–552.
- Lakshminarayanan V, Lewallen M, Frangianni NG, Evans AJ, Wedin KE, et al. (2001) Reactive oxygen intermediates induce monocyte chemotactic protein-1 in vascular endothelium after brief ischemia. *Am J Pathol* 159: 1301–1311.
- Simonini A, Moscucci M, Muller DW, Bates ER, Pagani FD, et al. (2000) IL-8 is an angiogenic factor in human coronary atherosclerotic tissue. *Circulation* 101: 1519–1526.
- Damas JK, Eiken HG, Oie E, Bjerkeli V, Yndestad A, et al. (2000) Myocardial expression of CC- and CXC-chemokines and their receptors in human end-stage heart failure. *Cardiovasc Res* 47: 778–787.
- Ardigo D, Assimes TL, Fortmann SP, Go AS, Hlatky M, et al. (2007) Circulating chemokines accurately identify individuals with clinically significant atherosclerotic heart disease. *Physiol Genomics* 31: 402–409.
